# Supplementary material for: Water-soluble and adjustable fluorescence copolymers containing a hydrochromic dye: synthesis, characterization and properties
Source: Royal Society of Chemistry journal article supplement (doi:10.1039/c8ra01306c), 2018-01-01
Supplement: c8ra01306c1.pdf [file c8ra01306c1.pdf]

## Supporting Information

### **Water-soluble and fluorescence adjustable copolymers containing a hydrochromic dye: synthesis, characterization and properties**

Le Ju<sup>a,b</sup>, Tianyou Qin<sup>a</sup>, Ting Zhang<sup>c</sup>, Peng Wang<sup>a</sup>, Lan Sheng<sup>\*a</sup> and Sean Xiao-An Zhang<sup>b,c</sup>

<sup>a</sup>College of Chemistry, Jilin University, Changchun, 130012, China.

E-mail: shenglan17@jlu.edu.cn; Fax: +86-431-85153812

<sup>b</sup>Department of Chemistry and Pharmacy, Zhuhai College of Jilin University, Zhuhai, 519041, China.

<sup>c</sup>State Key Lab of Supramolecular Structure and Materials, College of Chemistry, Jilin University, Changchun, 130012, China.

## Table of Contents

1. NMR and IR spectra of AM-Rh and **poly(AM-Rh<sub>x</sub> co NIPAM<sub>y</sub>)s** (**Figure S1 – S4**)
2. Test and calculation of molar absorption coefficient of AM-Rh (**Figure S5**)
3. GPC raw data (**Figure S6**)
4. The contrast between halochromism of AM-Rh and hydrochromism (**Figure S7, S8**)
5. The solubility of **P0** in binary solvents of DMF-H<sub>2</sub>O (**Figure S9, S10**)
6. Halochromism of **P1/100** and hydrochromic of AM-Rh in binary solvents of DMF-H<sub>2</sub>O (**Figure S11, S12**)
7. Halochromism and fluorescence of AM-Rh in DMF (**Figure S13**)
8. Hydrochromism and fluorescence of NH<sub>2</sub>-Rh in binary solvents of DMF-H<sub>2</sub>O (**Figure S14**)
9. Fluorescence of AM-Rh in binary solvents of DMF-H<sub>2</sub>O (**Figure S15**)
10. Fluorescence of AM-Rh vary with temperature (**Figure S16**)

## 1. NMR and IR spectra of AM-Rh and poly(AM-Rh<sub>x</sub> co NIPAM<sub>y</sub>)s

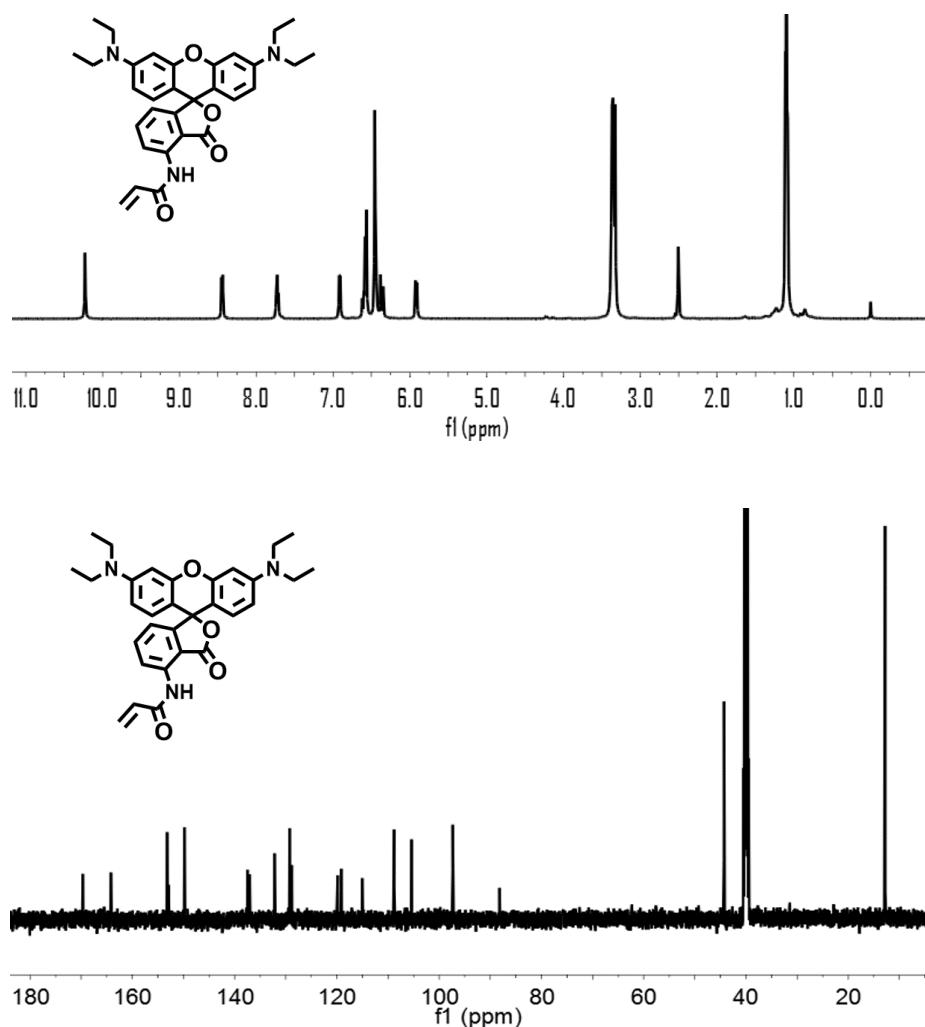

**Figure S1.** <sup>1</sup>H NMR and <sup>13</sup>C NMR of AM-Rh.

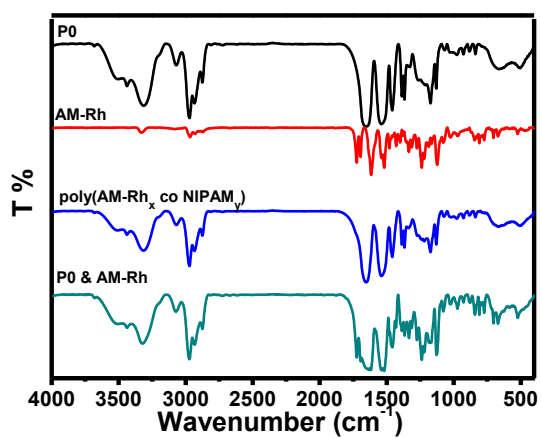

**Figure S2.** Infrared spectrum of P0, AM-Rh, P1/50 and mixture of P0 & AM-Rh.

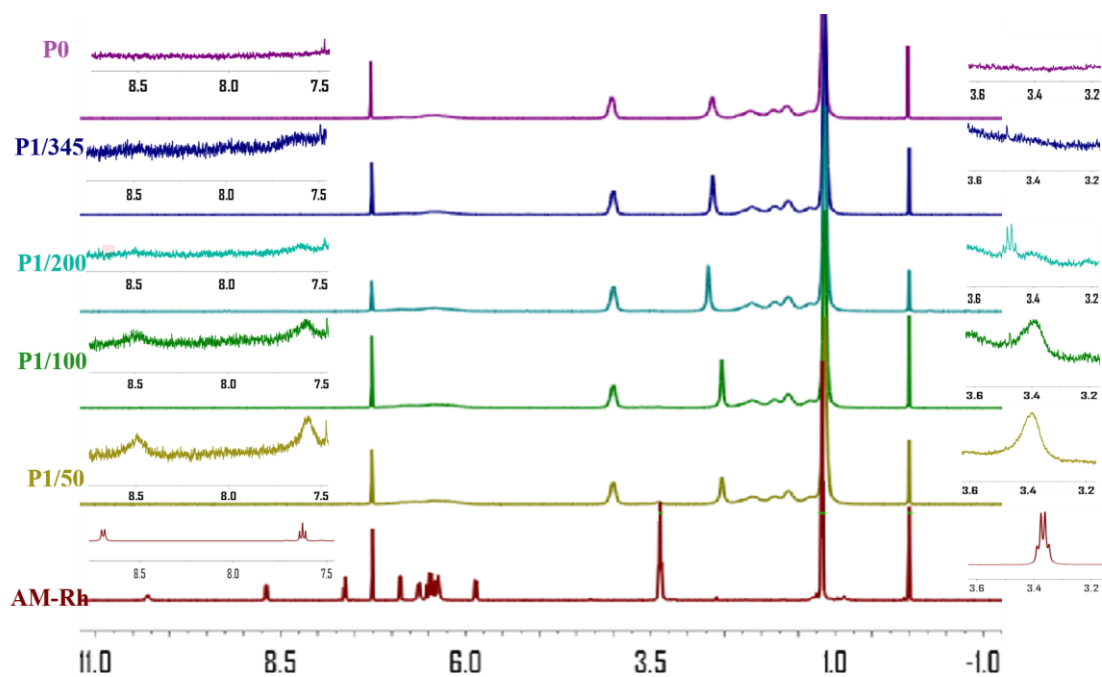

Figure S3.  $^1\text{H}$  NMR spectra of P1/50, P1/100, P1/200, P1/345, P0.

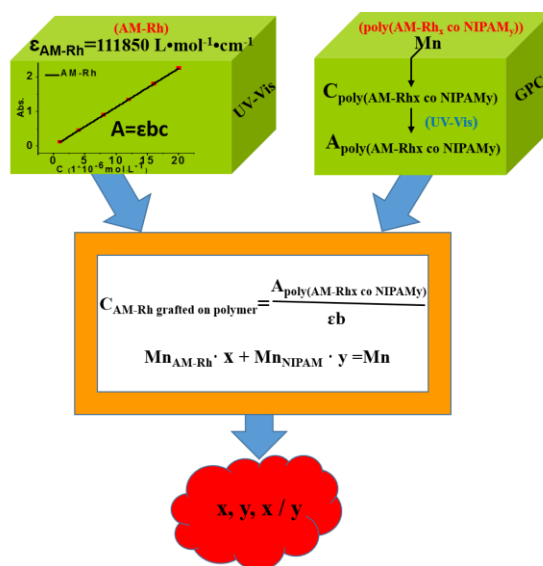

Figure S4 Schematic diagram for calculating values of  $x$ ,  $y$ , and  $x/y$ .

## 2. Test and calculation of molar absorption coefficient of AM-Rh

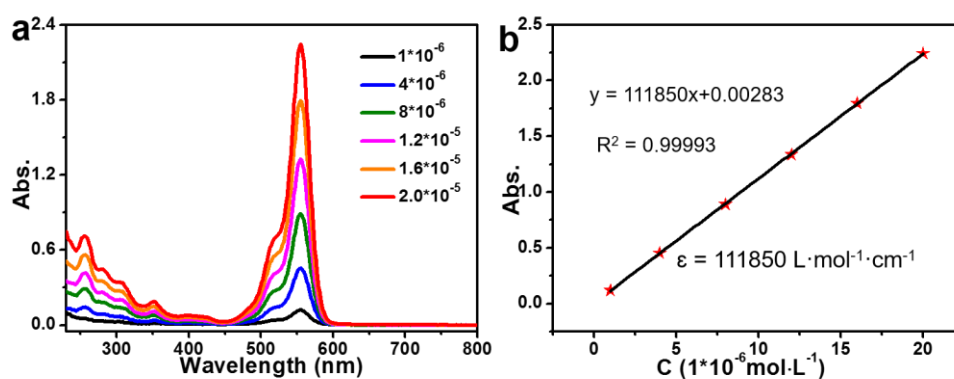

**Figure S5.** a) The UV-Vis spectra of AM-Rh in methanol with concentration ranging from  $1 \times 10^{-6}$  mol L<sup>-1</sup> to  $2 \times 10^{-5}$  mol L<sup>-1</sup>. b) Absorbance values plotted against concentration in MeOH, molar absorption coefficient ( $\epsilon$ ) of AM-Rh was calculated as  $111850 \text{ L mol}^{-1} \text{ cm}^{-1}$ .

## 3. GPC raw data

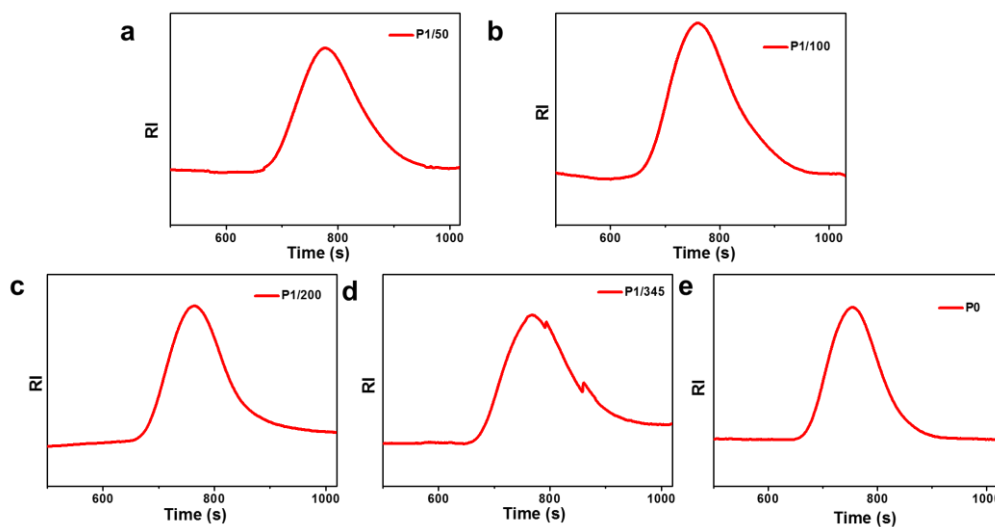

**Figure S6.** The raw GPC data of polymer.

#### 4. The contrast between halochromism of AM-Rh and hydrochromism

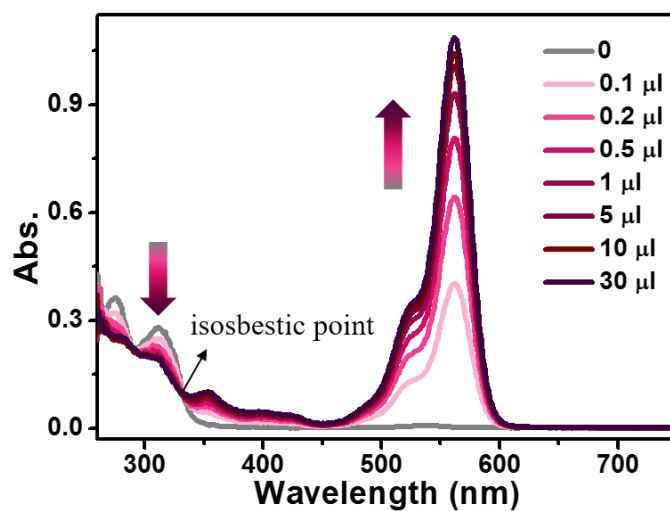

**Figure S7.** The UV-Vis spectra of AM-Rh ( $C = 1 \times 10^{-5} \text{ mol L}^{-1}$ ) in DMF with gradually adding  $\text{CF}_3\text{COOH}$ .

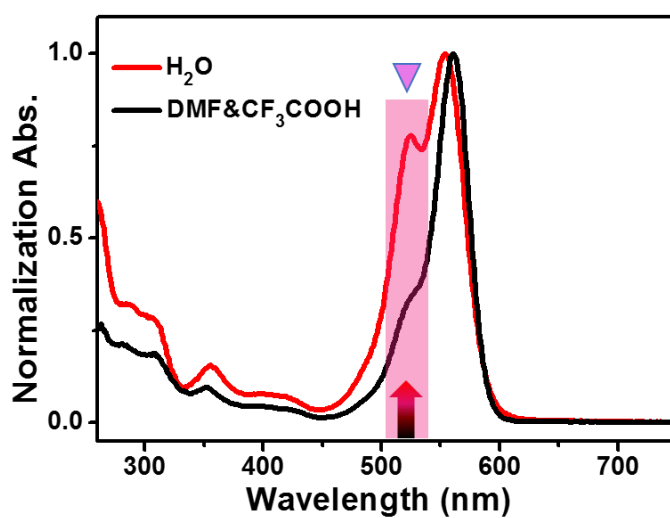

**Figure S8.** Normalized UV-Vis spectra of the solution of P1/100 (0.2 mg / mL) in water and in DMF with addition of  $\text{CF}_3\text{COOH}$ .

## 5. The solubility of P0 in DMF-H<sub>2</sub>O mixed systems

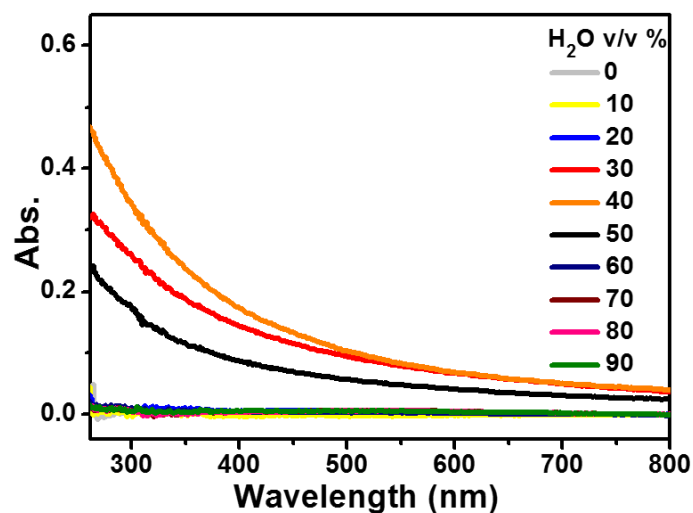

**Figure S9.** The UV-Vis spectra of the solution of **P0** (0.2 mg / mL) in variable mixtures of DMF and water with increasing percentage of water by volume from 0 to 90% at 25 °C.

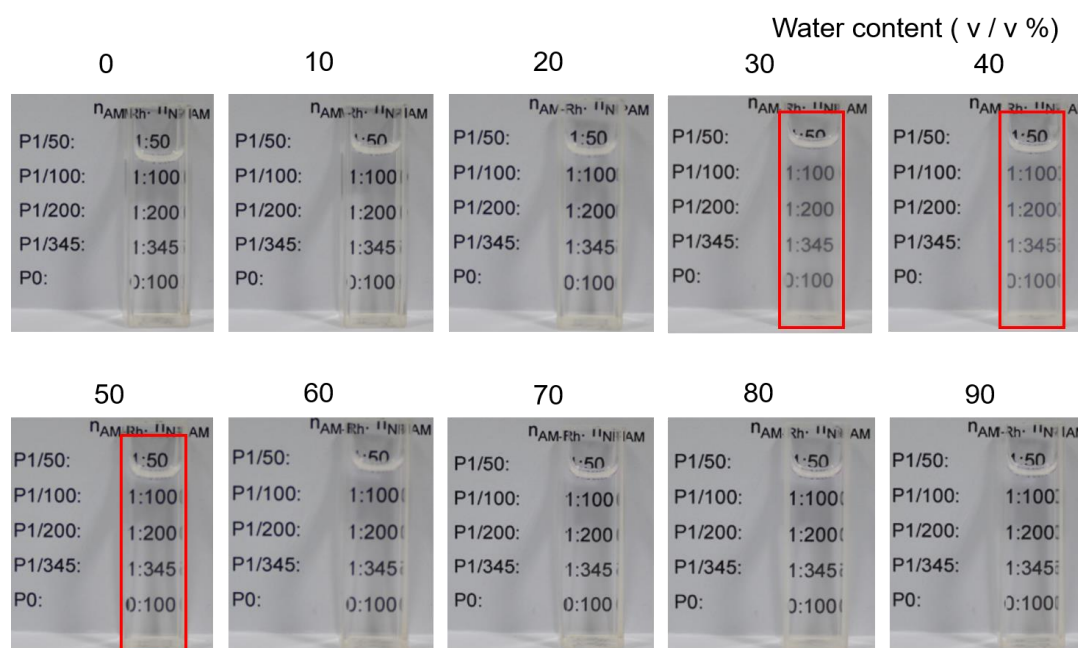

**Figure S10.** Photographs of **P0** (0.2 mg / mL) in variable mixtures of DMF and water with increasing percentage of water by volume from 0 to 90% at 25 °C.

## 6. Halochromism of P1/100 and hydrochromic of AM-Rh in mixtures of DMF-H<sub>2</sub>O

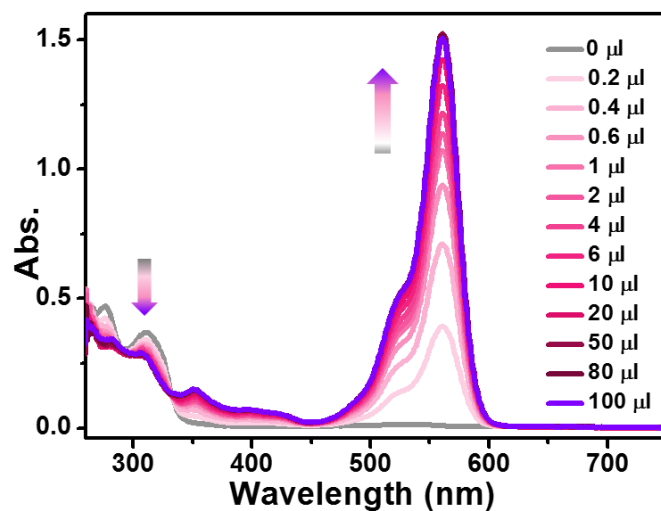

**Figure S11.** The UV-Vis spectra of **P1/100** (0.2 mg / ml) in DMF with adding CF<sub>3</sub>COOH.

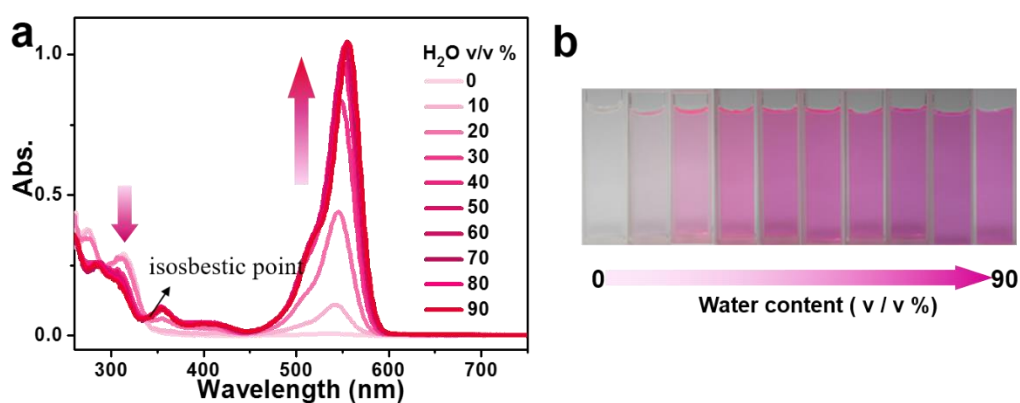

**Figure S12.** a) UV-Vis spectra of the solution of AM-Rh ( $C = 1 \times 10^{-5} \text{ mol L}^{-1}$ ) in variable mixtures of DMF and water with increasing percentage of water by volume from 0 to 90%. b) The corresponding photographs of AM-Rh in different water contents.



## 7. Halochromism and fluorescence of AM-Rh in DMF with adding CF<sub>3</sub>COOH

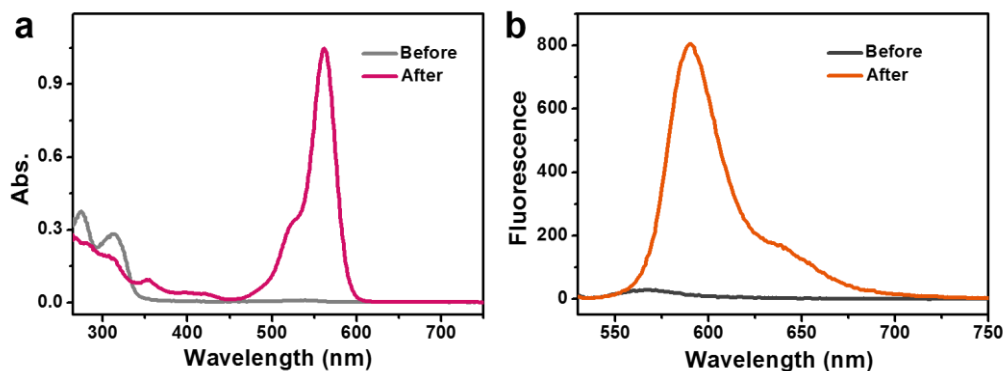

**Figure S13.** a) The UV-Vis spectra of AM-Rh ( $C = 1 \times 10^{-5} \text{ mol L}^{-1}$ ) in DMF before (gray) and after (magenta) adding CF<sub>3</sub>COOH. b) Fluorescence of AM-Rh ( $C = 1 \times 10^{-5} \text{ mol L}^{-1}$ ) in DMF before (gray) and after (orange) adding CF<sub>3</sub>COOH ( $\lambda_{\text{ex}} = 530 \text{ nm}$ ; slit width: 3, 1.5).

## 8. Hydrochromic and fluorescence of NH<sub>2</sub>-Rh in mixtures of DMF-H<sub>2</sub>O

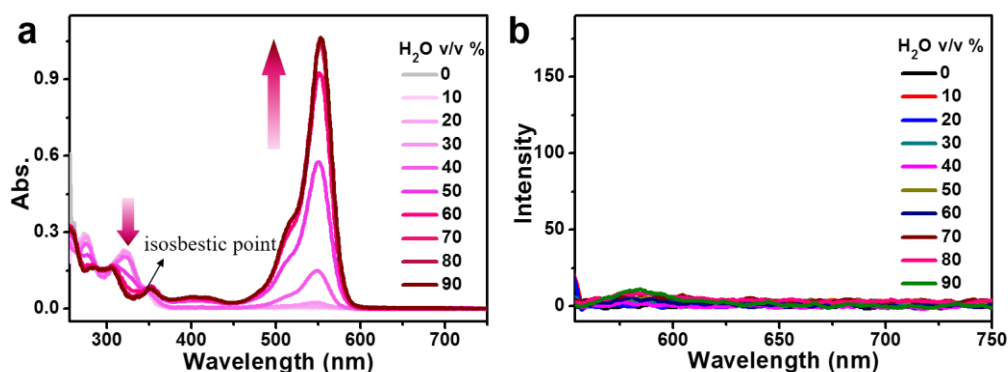

**Figure S14.** a) UV-vis spectra of the solution of NH<sub>2</sub>-Rh ( $C = 1 \times 10^{-5} \text{ mol L}^{-1}$ ) in variable mixtures of DMF and water with increasing percentage of water by volume from 0 to 90%. b) The fluorescence spectra of the solution of NH<sub>2</sub>-Rh in variable mixtures of DMF and water with increasing percentage of water by volume from 0 to 90% at 25 °C ( $C = 1 \times 10^{-5} \text{ mol L}^{-1}$ ,  $\lambda_{\text{ex}} = 530 \text{ nm}$ ; slit width: 3, 1.5).

## 9. Florescence of AM-Rh in mixtures of DMF-H<sub>2</sub>O

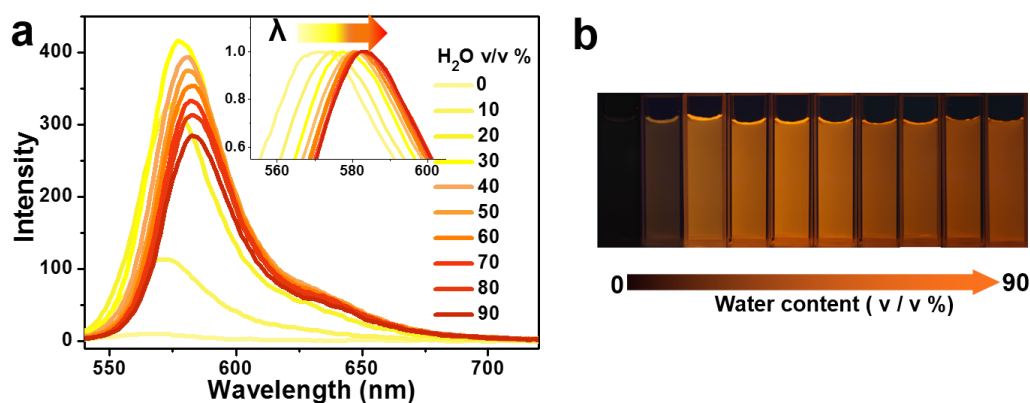

**Figure S15.** a) The fluorescence spectra of the solution of AM-Rh in variable mixtures of DMF and water with increasing percentage of water by volume from 0 to 90% at 25 °C ( $C = 1 \times 10^{-5}$  mol L<sup>-1</sup>,  $\lambda_{\text{ex}} = 530$  nm; slit width: 3, 1.5). b) The corresponding fluorescence photographs of AM-Rh in different water contents.

## 10. Florescence of AM-Rh vary with temperature

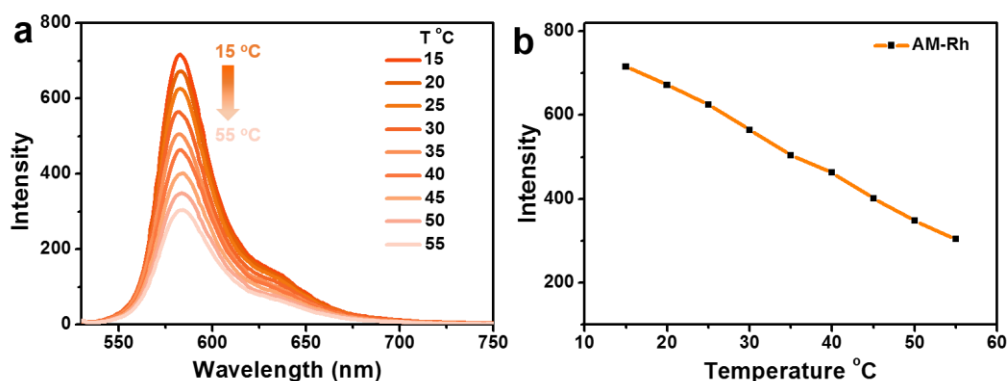

**Figure S16.** a) The fluorescence spectra of the solution of AM-Rh ( $C = 1 \times 10^{-5}$  mol L<sup>-1</sup>) in H<sub>2</sub>O with varying temperature from 15 to 55 °C ( $\lambda_{\text{ex}} = 530$  nm; slit width: 3, 1.5). b) Fluorescence changes of AM-Rh ( $C = 1 \times 10^{-5}$  mol L<sup>-1</sup>) in H<sub>2</sub>O with varying temperature from 15 to 55 °C.
